# Supplementary material for: Exogenous Gibberellin Promotes the Germination of Phellodendron Chinense Schneid Seeds by Regulating the Expression of Phytohormone Related Genes and Anabolic Proteins
Source: Research Square preprint supplement (doi:10.21203/rs.3.rs-133103/v1), 2020-12-30
Supplement: Supplementary file 1 [file 7b901e60cf716e760b380d16.docx]

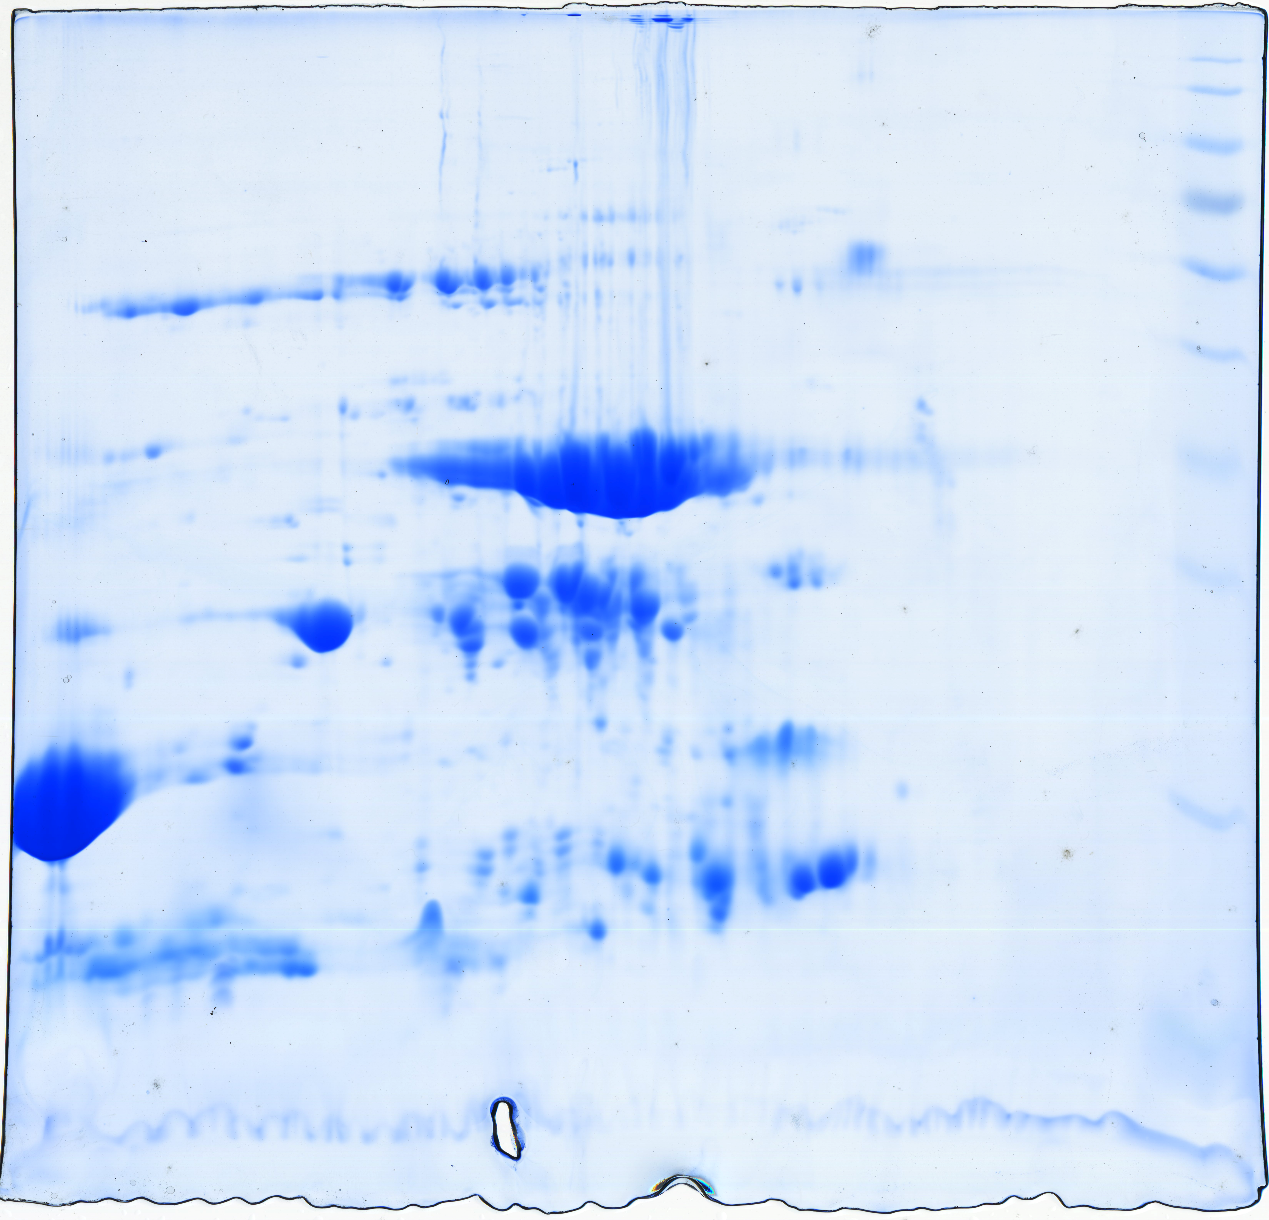


Fig. 6 A: proteomics analysis of *Phellodendron chinense* Schneid seeds under water treatment at 0 d


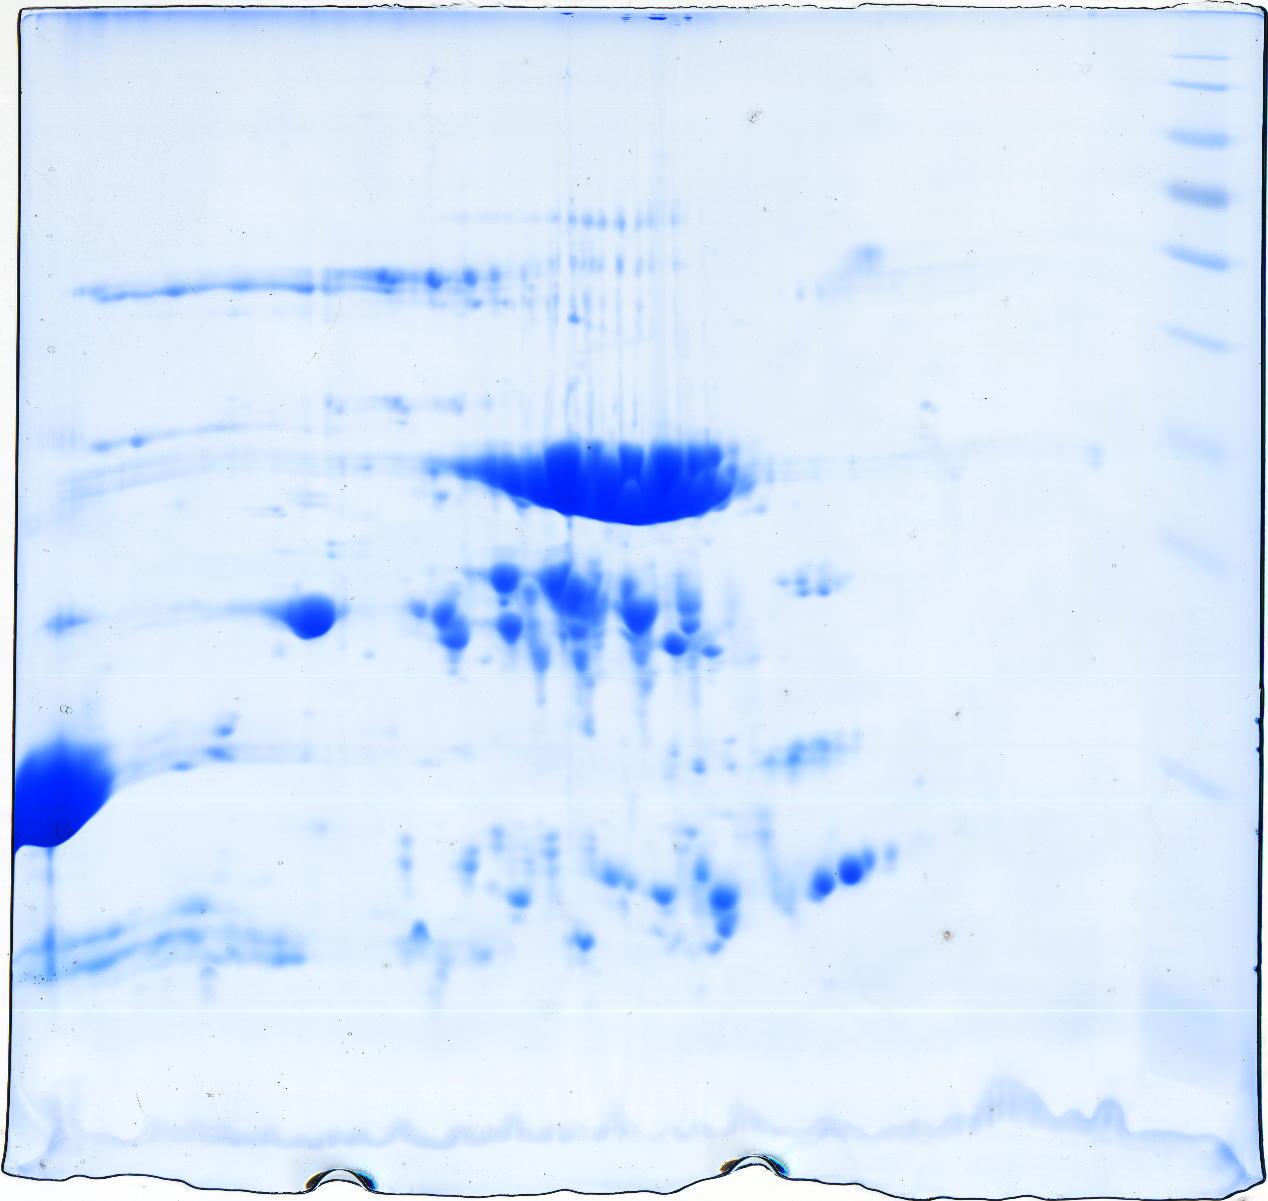


Fig. 6 B: proteomics analysis of *Phellodendron chinense* Schneid seeds under water treatment at 3 d


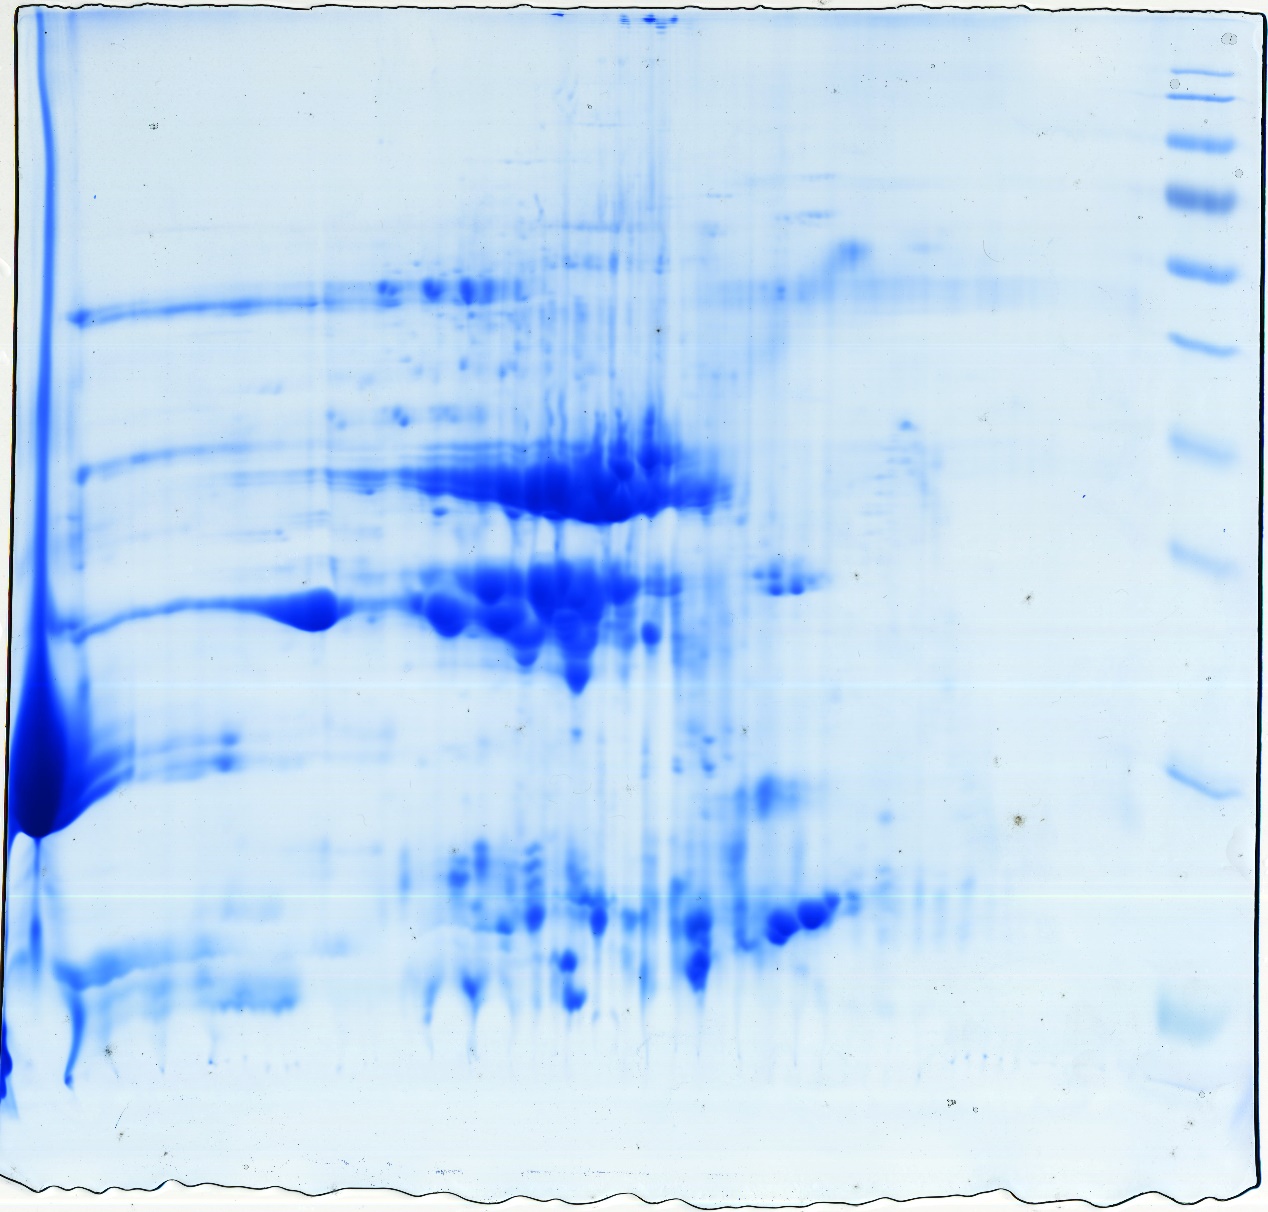


Fig. 6 C: proteomics analysis of *Phellodendron chinense* Schneid seeds under water treatment at 6 d


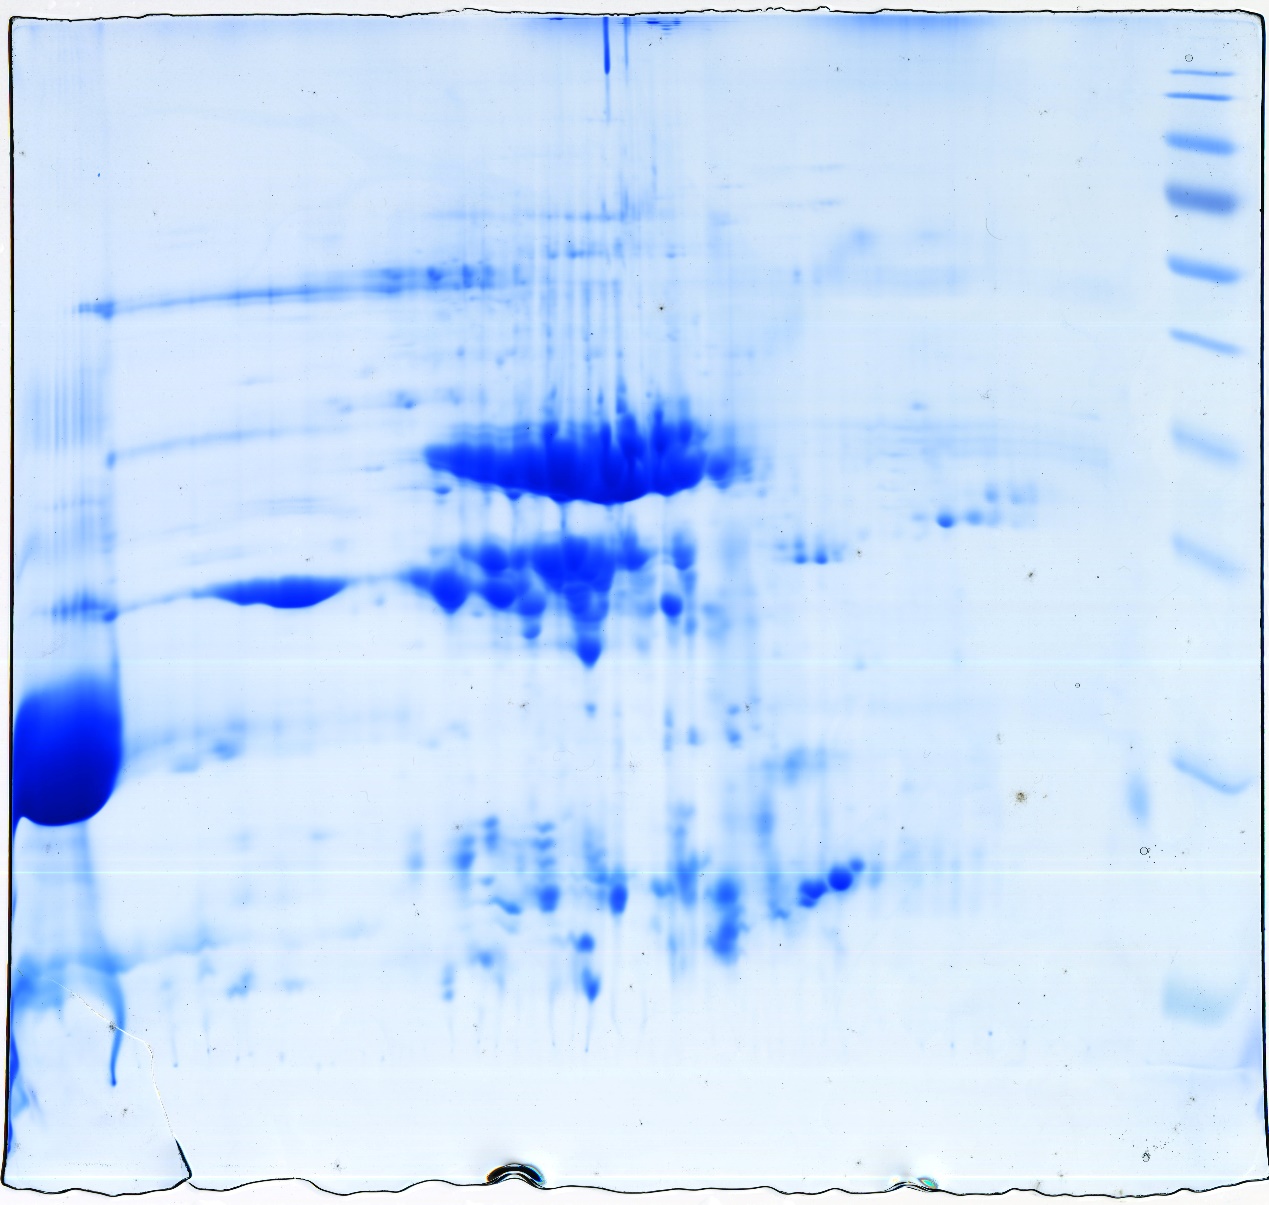


Fig. 6 D: proteomics analysis of *Phellodendron chinense* Schneid seeds under water treatment at 9 d


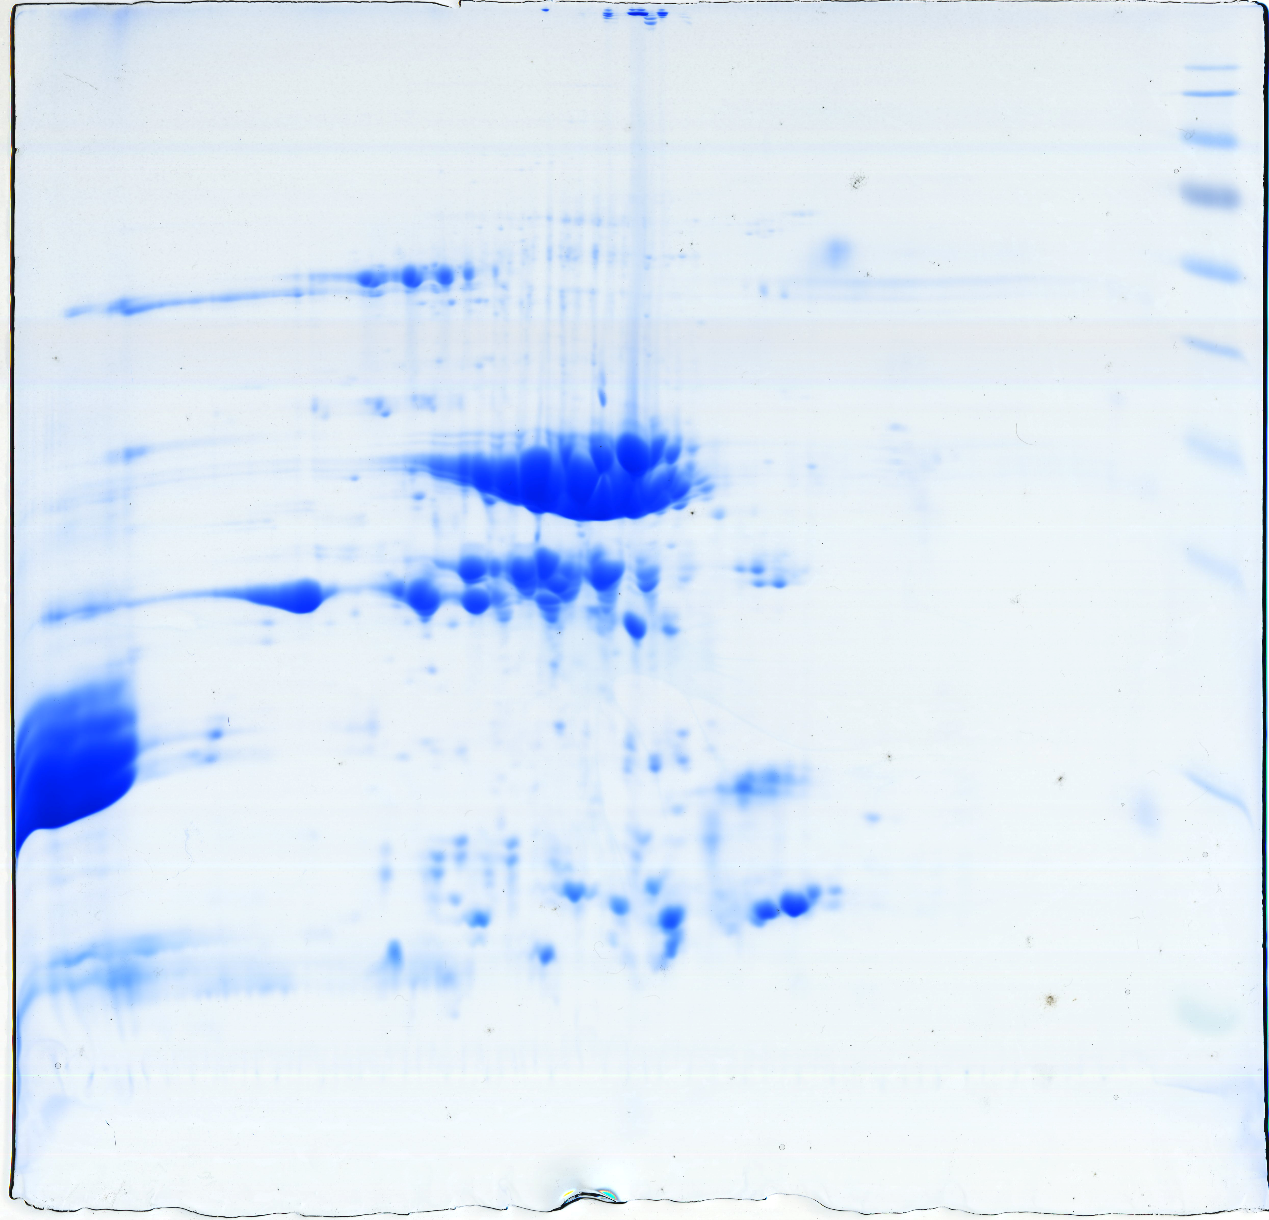


Fig. 6 E: proteomics analysis of *Phellodendron chinense* Schneid seeds under GA3 treatment at 0 d


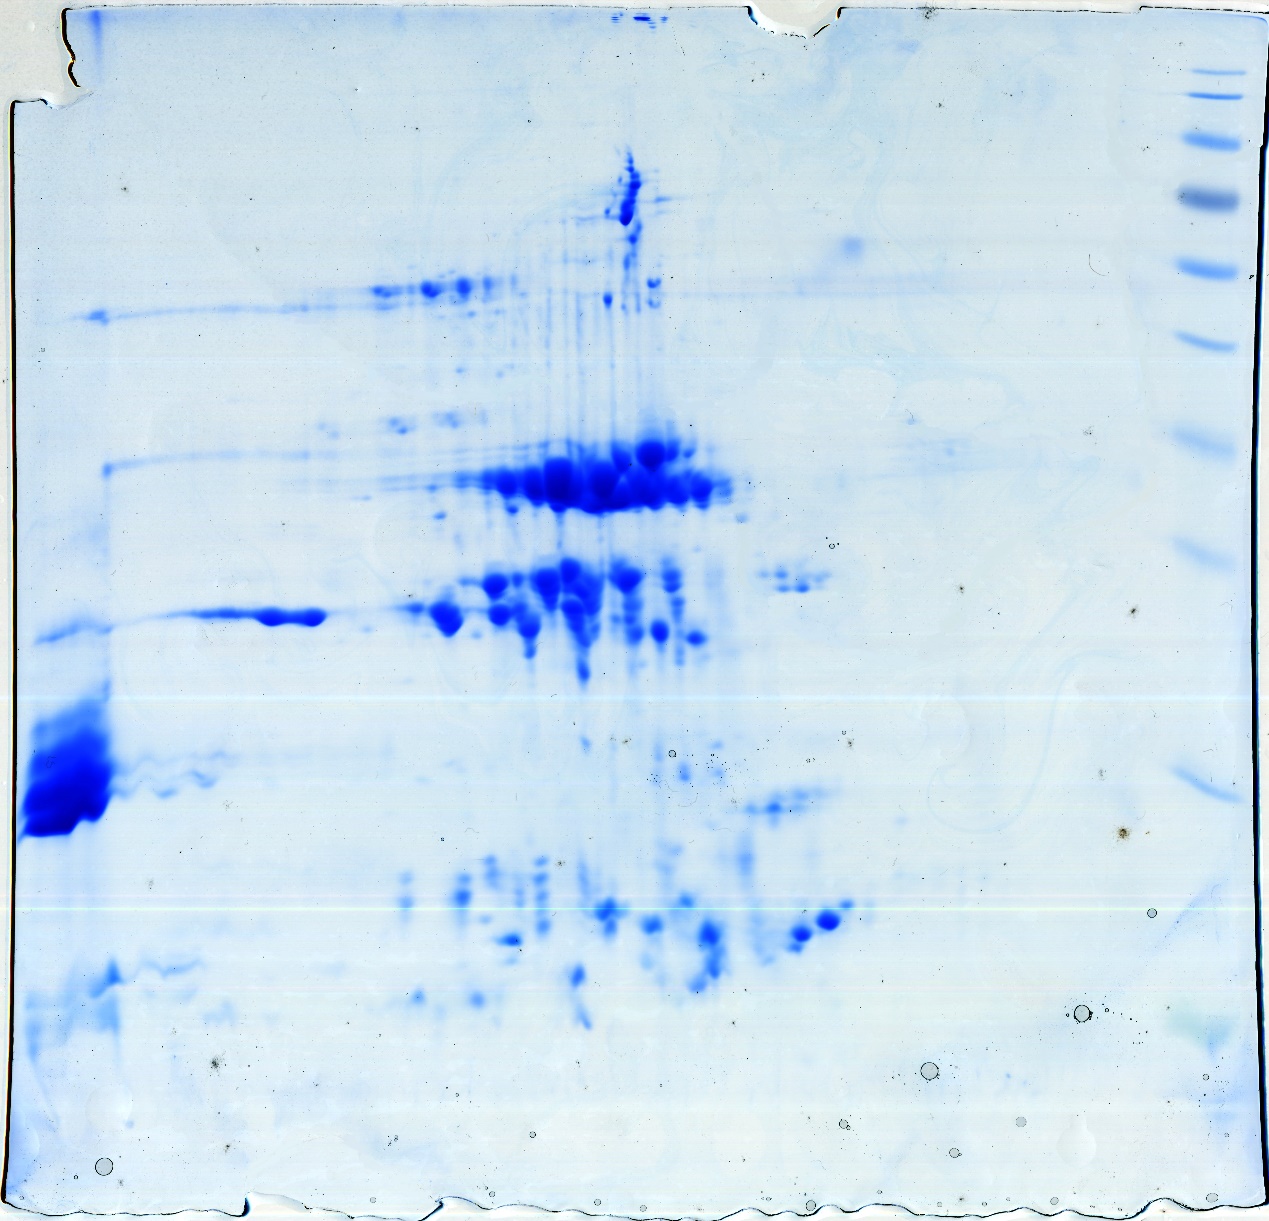


Fig. 6 F: proteomics analysis of *Phellodendron chinense* Schneid seeds under GA3 treatment at 3 d


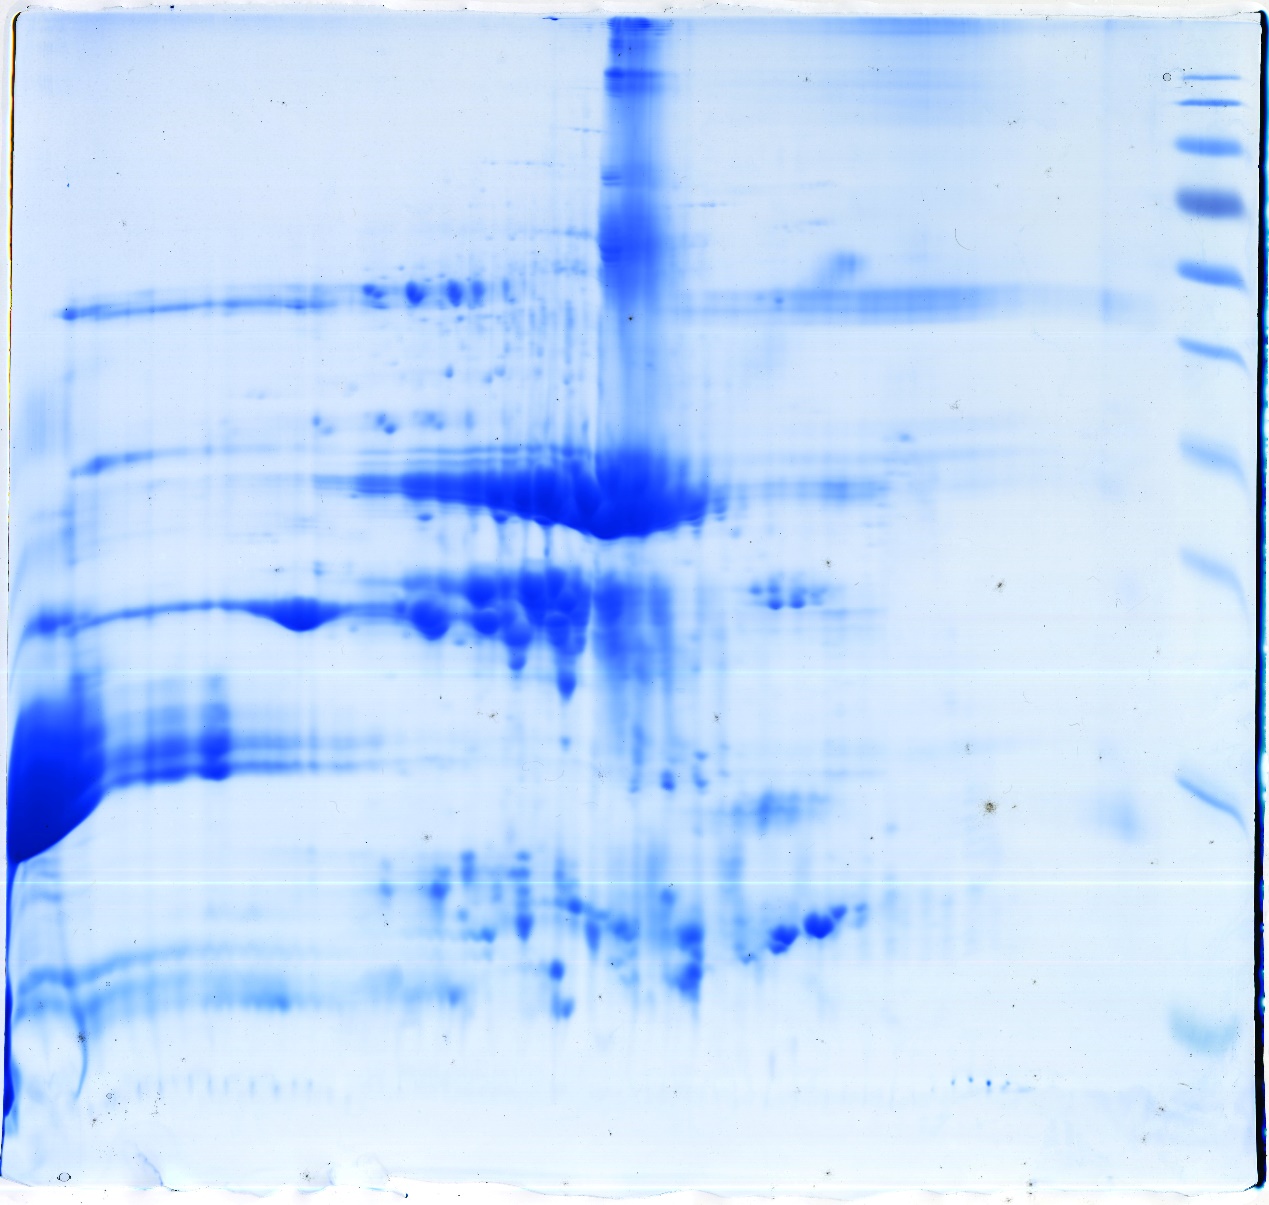


Fig. 6 G: proteomics analysis of *Phellodendron chinense* Schneid seeds under GA3 treatment at 6 d


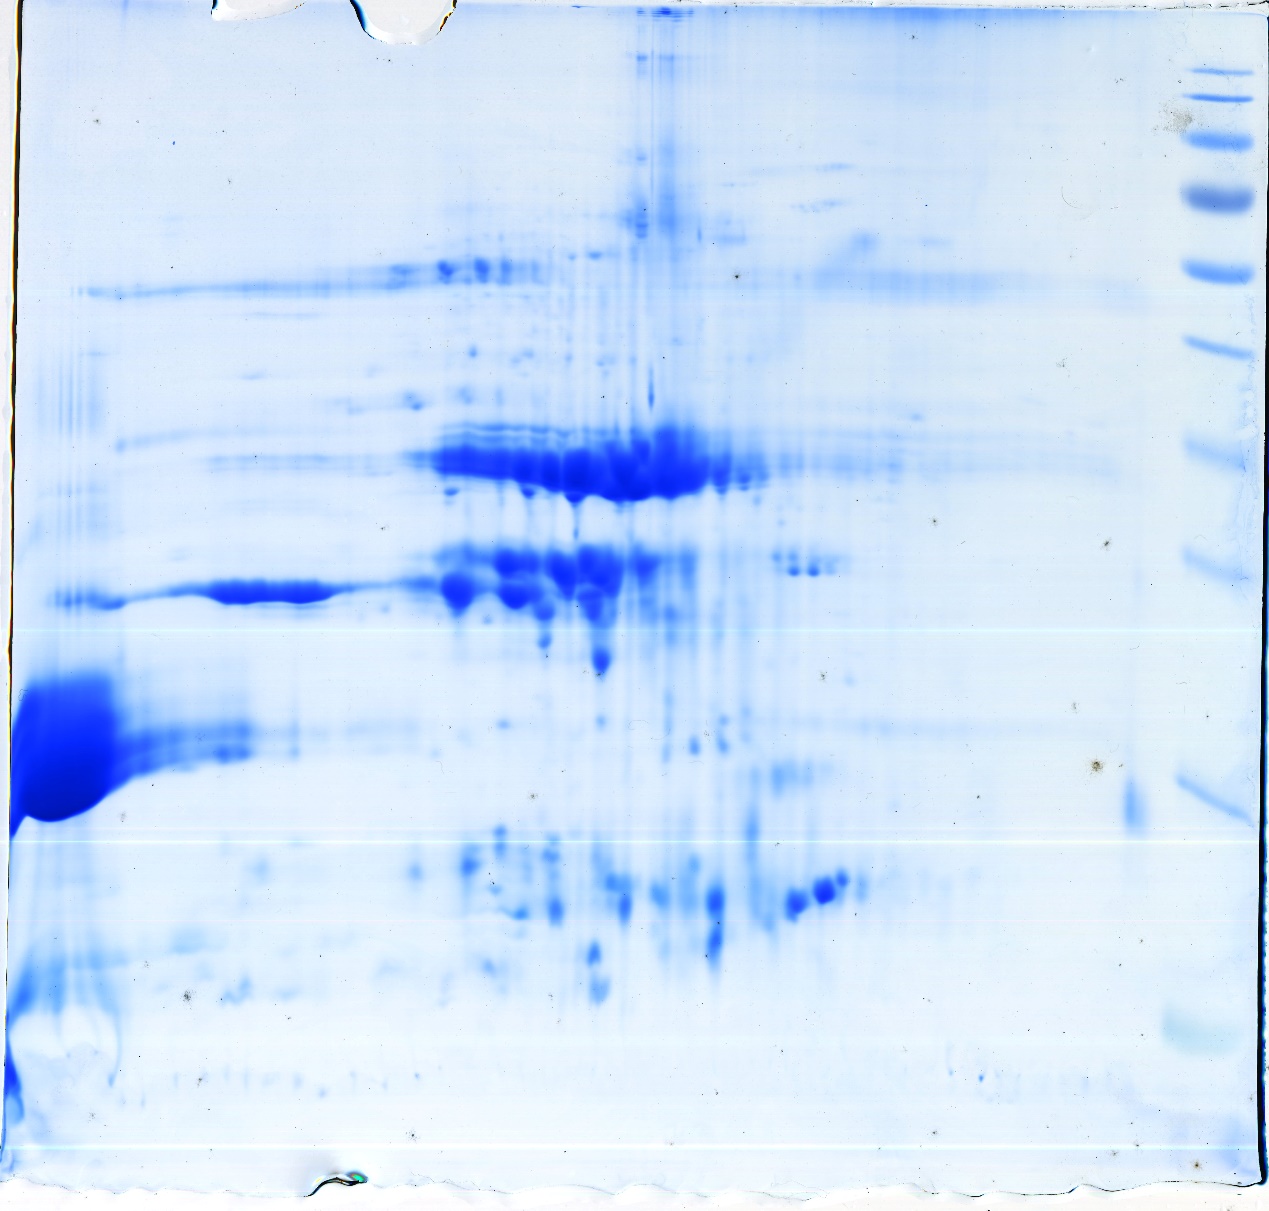


Fig. 6 H: proteomics analysis of *Phellodendron chinense* Schneid seeds under GA3 treatment at 9 d
